# Supplementary material
Source: publisher site journal article supplement (https://static.cambridge.org/content/id/urn:cambridge.org:id:article:S0014479719000085/resource/name/S0014479719000085supp001.docx)
Supplement: Supplementary file 1 [file S0014479719000085supp001.docx]

**Table S1.** The trial seasons, number of farms involved, replication and the number of varieties screened each season.

| **Season** | **Number of Farms** | **Number of Replicates per farm** | **Number of varieties screened** |
| --- | --- | --- | --- |
| 2011LR | 3 | 3 | 3 |
| 2011SR | 3 | 3 | 3 |
| 2012LR | 3 | 3 | 4 |
| 2012SR | 3 | 3 | 4 |
| 2013LR | 3 | 3 | 5 |
| 2013SR | 3 | 3 | 5 |
| 2014LR | 9 | 1 | 5 |
| 2014SR | 9 | 1 | 5 |
| 2015LR | 15 | 1 | 5 |
| 2015SR | 15 | 1 | 5 |
| 2016LR | 15 | 1 | 5 |
